# Supplementary material
Source: Springer Nature journal article supplement (https://www.springermedizin.de/resource/supplementary/12876_2013_992_MOESM2_ESM.pdf/9437872)

**a**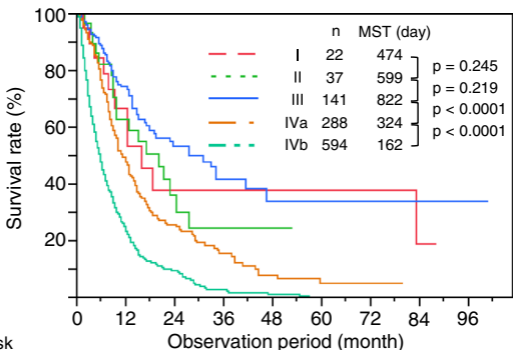

N at risk

|           |     |    |    |    |   |   |   |   |   |
|-----------|-----|----|----|----|---|---|---|---|---|
| Stage I   | 22  | 9  | 4  | 4  | 4 | 4 | 4 | 2 | 1 |
| Stage II  | 37  | 16 | 6  | 5  | 2 | 1 | 1 | 1 | 1 |
| Stage III | 141 | 70 | 36 | 19 | 8 | 6 | 5 | 2 | 2 |
| Stage IVa | 288 | 94 | 35 | 15 | 9 | 4 | 2 | 1 | 1 |
| Stage IVb | 594 | 80 | 24 | 6  | 3 | 1 | 0 | 0 | 0 |

**b**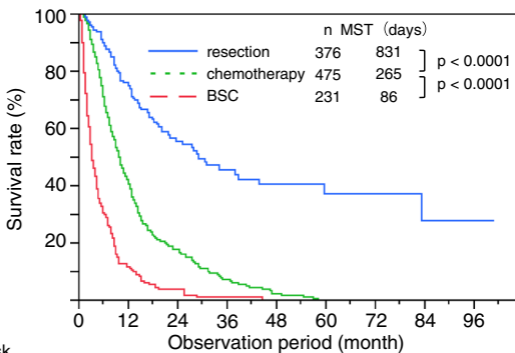

N at risk

|              |     |     |    |    |    |    |   |   |   |
|--------------|-----|-----|----|----|----|----|---|---|---|
| resection    | 376 | 108 | 55 | 31 | 17 | 13 | 9 | 3 | 2 |
| chemotherapy | 475 | 141 | 43 | 14 | 5  | 1  | 0 | 0 | 0 |
| BSC          | 231 | 18  | 4  | 2  | 1  | 0  | 0 | 0 | 0 |

Supplement: MOESM2 [file 9437872]
